# Supplementary material
Source: PubMed Central journal article supplement (PMC4472565)

## Supplemental Material

### Figure Legends

#### **Figure 1S Durations of AP and CaT are tightly correlated during paced rhythm in LQT2**

**A:** Simultaneous  $Ca_i$  and  $V_m$  tracings from 2 pixels (**a**, **b**) indicated in the left panel. The basal site has longer APD and 2 secondary CaT elevations, while the more apical site has only one secondary CaT rise. The APD and CaTD are very similar at each site. The maps of  $CaTD_{80}$   $APD_{80}$  (**B**) and the corresponding scatterplot (**C**) demonstrate excellent correlation between the two variables.

#### **Figure 2S: Propagated EADs arise in regions of steep voltage gradients**

**A**  $Ca_i$  and  $V_m$  tracings during EAD from 3 pixels (**a-c**) indicated in the  $Ca_i$  and  $V_m$  maps. As seen in the map of activation time of the EAD propagation (**AT**; **right panel**), the earliest  $V_m$  upstroke occurs at site **b**, which exhibits steep  $V_m$  gradient immediately before the ectopic beat in the  $V_m$  map. **B** An example of voltage gradient map (**top panel**; warm colors indicate steep gradient) and activation map (**bottom panel**) of an EAD in another experiment. The dotted lines indicate the EAD focus. The site has a steep voltage gradient before EAD onset. **C** Relative voltage gradients at the site of EAD are plotted for 6 different experiments.

#### **Figure 3S: Low [K201] suppress LQT2-related arrhythmias**

**A** Simultaneous optical recordings of voltage ( $V_m$  in blue) and intracellular  $Ca^{2+}$  ( $Ca_i$  in red) during an arrhythmia elicited by perfusion with dofetilide (0.5  $\mu$ M) and 50% reduction of KCl and  $MgCl_2$ .

**B** Perfusion with 0.5  $\mu$ M K201 for 5 min suppressed the arrhythmia

#### **Figure 4S Systolic and diastolic $Ca_i$ elevations from the same region of epicardium**

$Ca_i$  tracings from 2 pixels (**top**) initiated by electrical pacing during low-resolution optical mapping. Site **a**, but not site **b**, exhibits both systolic and diastolic  $Ca_i$  rise. Systolic and diastolic  $Ca_i$  maps during paced rhythm 1 and 3 minutes after LQT2 show the overlap between areas of systolic and diastolic  $Ca^{2+}$  release (**middle and bottom**). The pixels **a** and **b** from the top panel are indicated in the bottom maps. Note the different color scale in the systolic and diastolic maps.

**Figure 5S: During propagated DADs,  $Ca_i$  rise precedes  $V_m$  rise at the ectopic focus.**

The top panel shows simultaneous  $Ca_i$  and  $V_m$  tracing from a low-resolution experiment during ventricular arrhythmia with 3 ectopic beats marked by arrowheads. The zero-phase maps displayed below for each of the beats for both  $Ca_i$  and  $V_m$  indicate the timing of signal upstroke in each pixel. Note that  $Ca_i$  rise precedes  $V_m$  rise at the earliest site.

**Figure 6S: Intracellular  $Ca^{2+}$  ripples**

Small-amplitude, spatially poorly synchronized  $Ca^{2+}$  waves were occasionally observed on top of prolonged CaT plateau in high-resolution experiments. A large number of these “ripples” are observed to propagate over a distance of a few  $\mu m$  in each myocyte in the field of view. See also **Movie F**.

**Movie Files:**

**Movie A:** Subcellular  $Ca^{2+}$  dynamics during 2 Hz pacing at baseline. The field of view is a square of  $150 \times 150 \mu m$  size in this and other high-resolution movies. The signal intensity is normalized in each pixel. At the bottom,  $Ca^{2+}$  signal from a single pixel is shown. The position of the moving cursor indicates the current movie frame. The CaT is monophasic and uniform across the field of view.

**Movie B:** High-resolution movie obtained during slow (1.2 s) pacing in LQT2. Secondary systolic  $Ca^{2+}$  oscillation is apparent, which is quite homogenous across the field of view.

**Movie C:** Diastolic  $Ca^{2+}$  waves are seen in this high-resolution movie recorded during slow pacing in LQT2. The secondary systolic  $Ca^{2+}$  upstroke takes the form of gradually up-sloping CaT plateau.

**Movie D:** During runs of VT in LQT2, multiple CaT upstrokes occur from a depressed CaT plateau in this high-resolution movie. They do not correspond to  $Ca^{2+}$  waves; rather, they are cell-synchronous.

**Movie E:** An example of simultaneous  $Ca^{2+}$  (left) and  $V_m$  (right) a low-resolution movie recorded during slow pacing in LQT2. The field of view is a square of  $15 \mu m$  size. The rapid upstroke is caused by RV pacing. The AP upstroke precedes the CaT upstroke slightly. Two systolic CaT oscillations follow the initial upstroke in this example. Note that SH of CaT exceeds SH of AP, although the signals are well correlated.

**Movie F:** In this high-resolution movie recorded in LQT2, the initial CaT upstroke is followed by a long, rectangular plateau, on which small-amplitude oscillations, or “ripples” are superimposed. The ripples are not well synchronized within the cell, although they do not propagate across the length of the cell in the same way as diastolic waves.

**Movie G:** High-resolution movie showing chaotic subcellular Ca<sup>2+</sup> dynamics in LQT2. Multiple Ca<sup>2+</sup> waves propagate through the cells, collide and annihilate, and new waves arise continuously. Low baseline Ca<sup>2+</sup> level is never achieved across the whole cell.

# Figure 1S

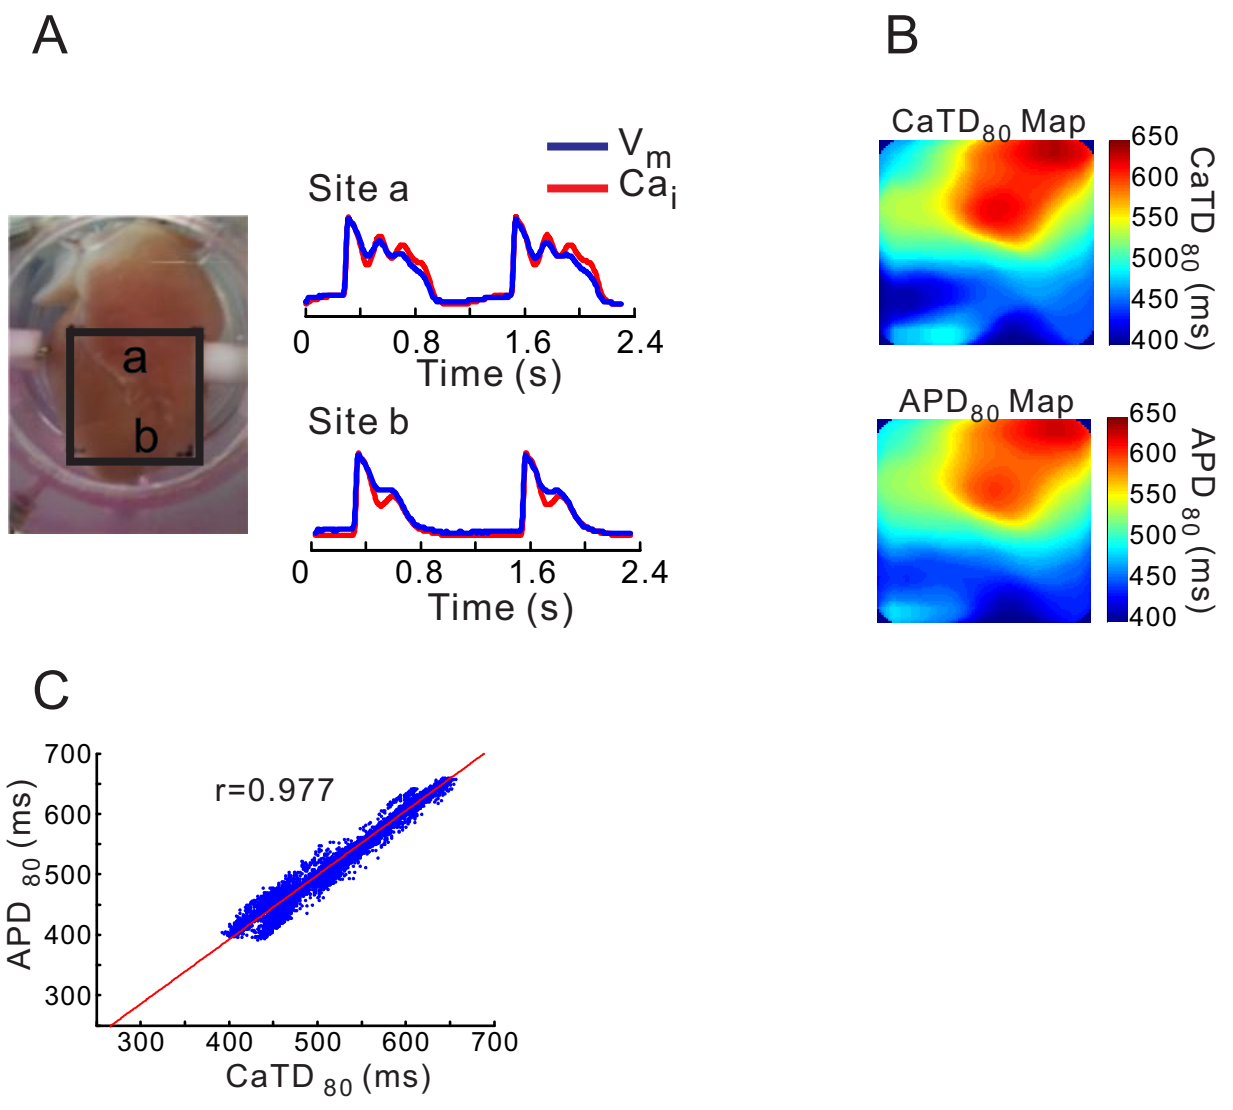

# Figure 2S

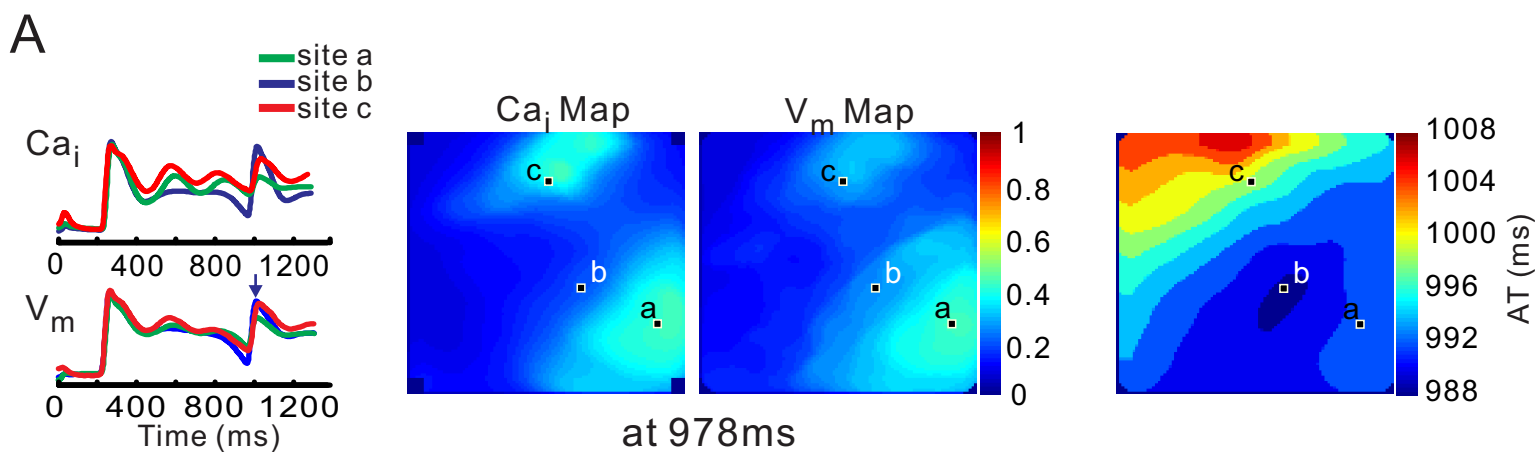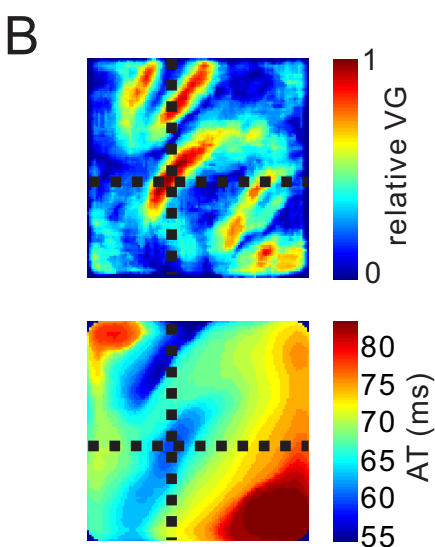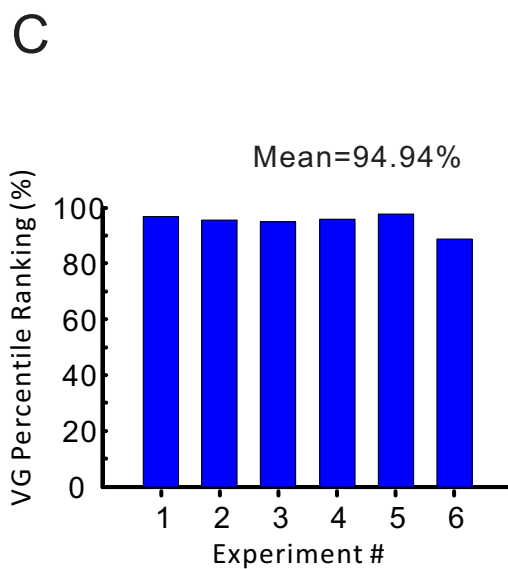

Figure 3S

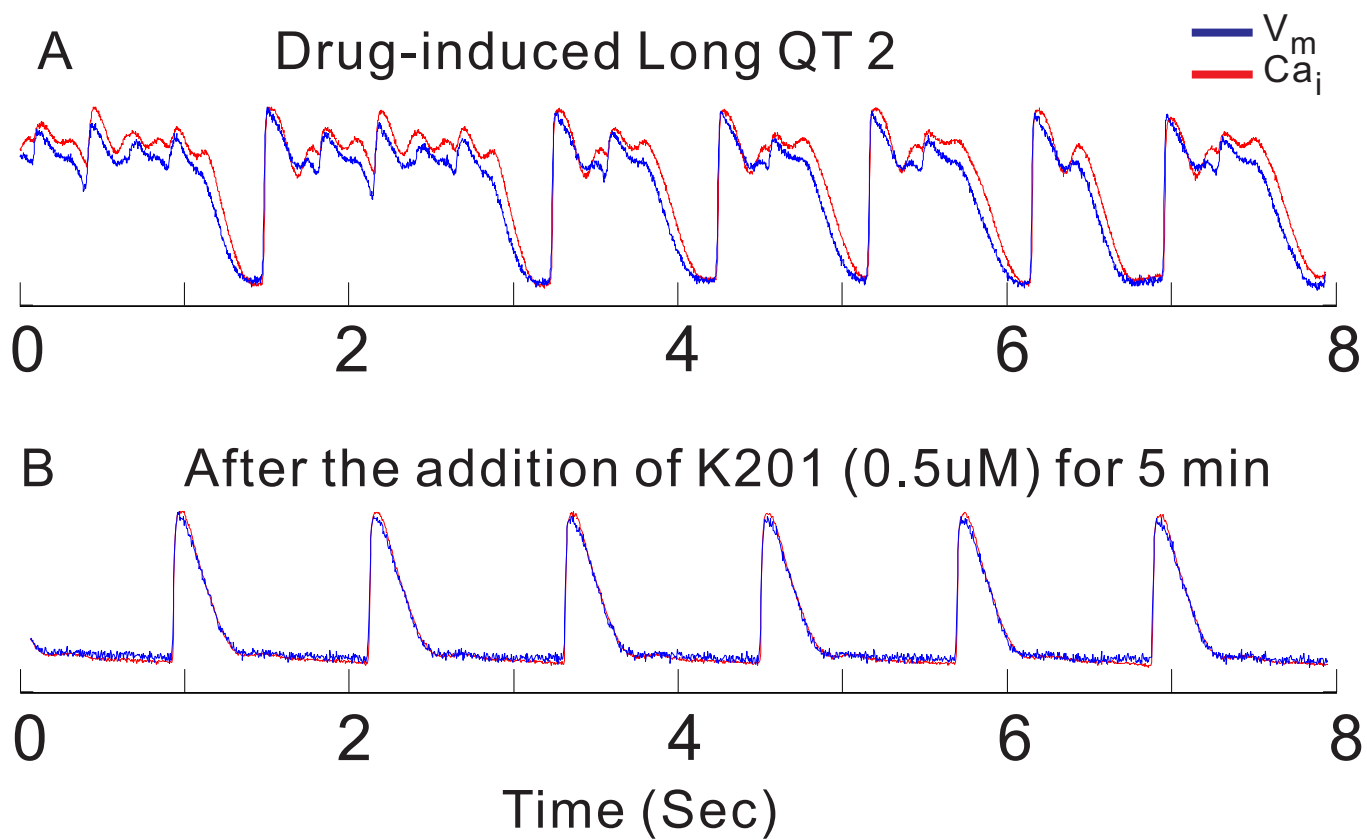

# Figure 4S

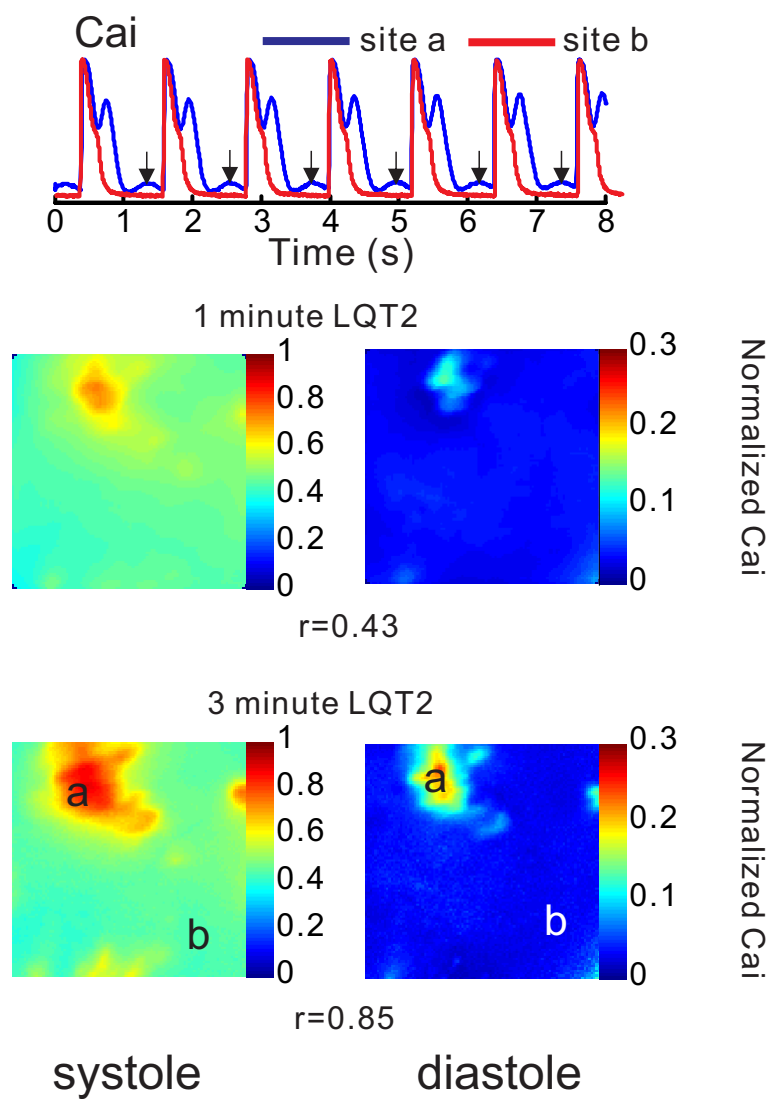

Figure 5S

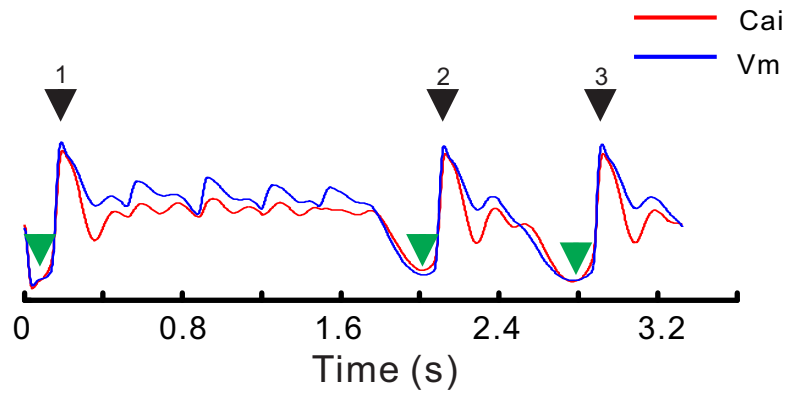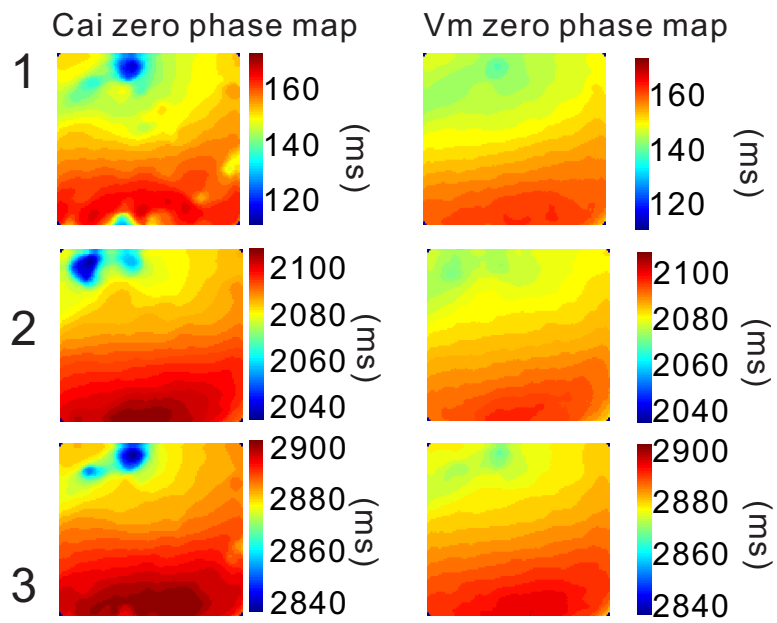



Figure 6S

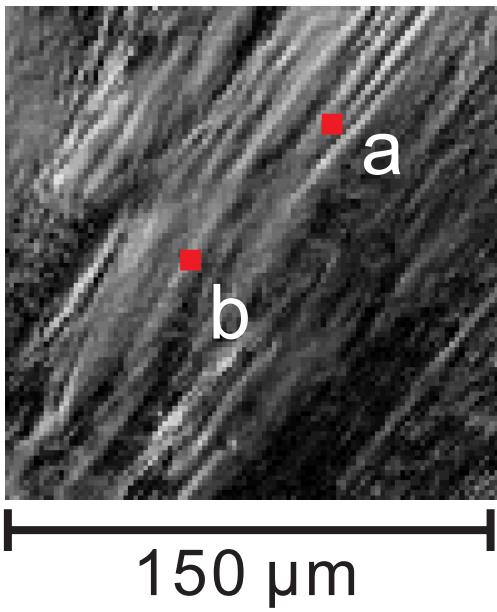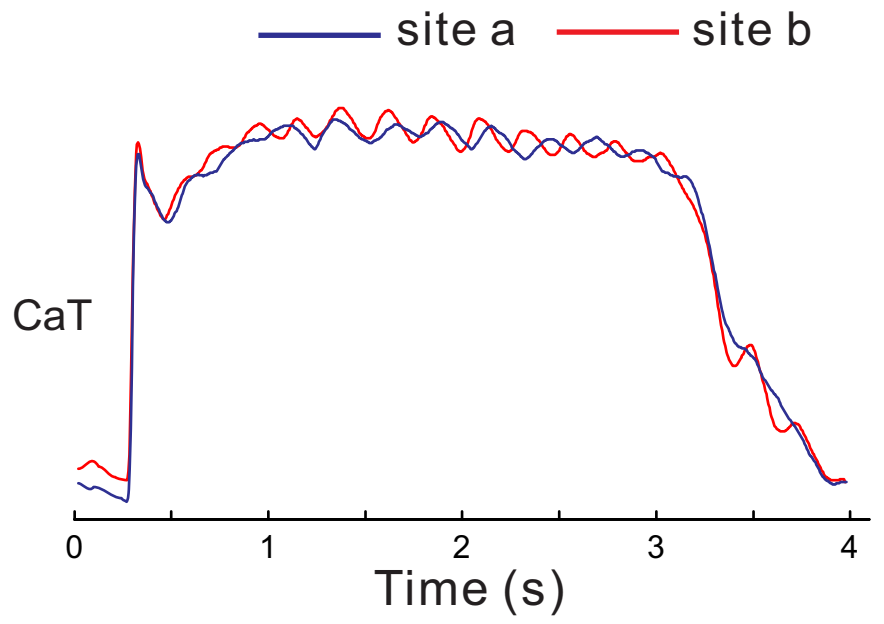

Supplement: NIHMS672582-supplement-Legends_and_supplemental_figures.pdf [file NIHMS672582-supplement-Legends_and_supplemental_figures.pdf]
